# Supplementary material for: Syntheses, structures, and photoluminescent properties of a series of metal–organic frameworks constructed by 5,5′-bis(1H-imidazol-1-yl)-2,2′-bithiophene and various carboxylate ligands
Source: Royal Society of Chemistry journal article supplement (doi:10.1039/c3ce41966e), 2013-10-30
Supplement: c3ce41966e.pdf [file c3ce41966e.pdf]

# Syntheses, Structures, and Photoluminescent Properties of a Series of Metal–Organic Frameworks Constructed by 5,5'-Bis(1*H*-imidazol-1-yl)-2,2'-Bithiophene and Various Carboxylate Ligands

Zhi-Qiang Shi, Yi-Zhi Li, Zi-Jian Guo, He-Gen Zheng\*

*State Key Laboratory of Coordination Chemistry, School of Chemistry and Chemical Engineering, Nanjing National Laboratory of Microstructures, Nanjing University, Nanjing 210093, P. R. China*

**Table S1.** Selected Bond Lengths (Å) and Angles (deg) for Compounds 1-7.

| Compound 1                       |            |                   |            |
|----------------------------------|------------|-------------------|------------|
| Co(1)-O(2)                       | 1.989(2)   | Co(1)-N(1)        | 2.049(3)   |
| Co(1)-O(3)#1                     | 1.908(7)   | Co(1)-N(3)        | 2.036(3)   |
| O(2)-Co(1)-N(3)                  | 110.46(11) | O(2)-Co(1)-N(1)   | 115.64(11) |
| N(1)-Co(1)-N(3)                  | 111.61(11) | O(2)-Co(1)-O(3)#1 | 107.6(2)   |
| N(3)-Co(1)-O(3)#1                | 97.3(3)    | N(1)-Co(1)-O(3)#1 | 112.7(3)   |
| Symmetry codes: #1 = x, y, -1+z. |            |                   |            |
| Compound 2                       |            |                   |            |
| Co(1)-O(1)                       | 2.1818(13) | Co(1)-O(2)        | 2.2257(12) |
| Co(1)-N(1)                       | 2.1187(15) | Co(1)-O(5)#1      | 2.0642(13) |
| Co(1)-O(6)#2                     | 2.0303(12) | Co(1)-N(4)#3      | 2.1423(15) |
| N(1)-Co(1)-O(2)                  | 87.84(5)   | N(1)-Co(1)-O(1)   | 93.82(5)   |
| O(6)#2-Co(1)-O(5)#1              | 111.91(5)  | O(6)#2-Co(1)-N(1) | 86.06(5)   |

|                                                                              |            |                     |            |
|------------------------------------------------------------------------------|------------|---------------------|------------|
| O(5)#1-Co(1)-N(1)                                                            | 88.31(6)   | O(6)#2-Co(1)-N(4)#3 | 90.53(5)   |
| O(5)#1-Co(1)-N(4)#3                                                          | 93.96(6)   | N(1)-Co(1)-N(4)#3   | 176.43(5)  |
| O(6)#2-Co(1)-O(1)                                                            | 99.40(5)   | O(5)#1-Co(1)-O(1)   | 148.68(5)  |
| N(4)#3-Co(1)-O(2)                                                            | 94.96(5)   | N(4)#3-Co(1)-O(1)   | 85.69(5)   |
| O(6)#2-Co(1)-O(2)                                                            | 157.92(5)  | O(5)#1-Co(1)-O(2)   | 89.07(5)   |
| Symmetry codes: #1 = x, 1+y, z; #2 = 2-x, 1-y, -z; #3 = 1+x, -1+y, -1+z.     |            |                     |            |
| <b>Compound 3</b>                                                            |            |                     |            |
| Zn(1)-O(1)                                                                   | 2.0475(12) | Zn(1)-N(1)          | 2.1397(15) |
| Zn(1)-O(2)#1                                                                 | 2.0339(12) | Zn(1)-O(3)#2        | 2.0170(12) |
| Zn(1)-N(4)#3                                                                 | 2.1124(15) |                     |            |
| O(1)-Zn(1)-N(1)                                                              | 89.91(6)   | O(2)#1-Zn(1)-O(1)   | 122.03(5)  |
| O(2)#1-Zn(1)-N(1)                                                            | 92.77(6)   | O(2)#1-Zn(1)-N(4)#3 | 88.72(6)   |
| O(1)-Zn(1)-N(4)#3                                                            | 84.70(5)   | O(3)#2-Zn(1)-O(2)#1 | 128.75(5)  |
| O(3)#2-Zn(1)-O(1)                                                            | 109.22(5)  | O(3)#2-Zn(1)-N(1)   | 87.28(6)   |
| O(3)#2-Zn(1)-N(4)#3                                                          | 96.02(6)   | N(4)#3-Zn(1)-N(1)   | 174.37(5)  |
| Symmetry codes: #1 = 1-x, -y, 1-z; #2 = 1-x, 1-y, 1-z; #3 = 1+x, -1+y, -1+z. |            |                     |            |
| <b>Compound 4</b>                                                            |            |                     |            |
| Cd(1)-O(1)                                                                   | 2.2615(15) | Cd(1)-N(1)          | 2.315(2)   |
| Cd(1)-N(4)#1                                                                 | 2.300(2)   | Cd(1)-O(2)#2        | 2.3062(17) |
| Cd(1)-O(3)#3                                                                 | 2.3641(15) | Cd(1)-O(4)#3        | 2.4291(17) |
| O(1)-Cd(1)-N(1)                                                              | 85.95(7)   | O(1)-Cd(1)-N(4)#1   | 96.74(7)   |
| O(1)-Cd(1)-O(2)#2                                                            | 111.58(6)  | N(4)#1-Cd(1)-O(2)#2 | 90.32(7)   |
| N(4)#1-Cd(1)-N(1)                                                            | 169.71(7)  | O(2)#2-Cd(1)-N(1)   | 79.47(7)   |
| O(1)-Cd(1)-O(3)#3                                                            | 146.26(6)  | N(4)#1-Cd(1)-O(3)#3 | 84.90(7)   |
| O(2)#2-Cd(1)-O(3)#3                                                          | 102.09(6)  | N(1)-Cd(1)-O(3)#3   | 98.40(7)   |
| O(1)-Cd(1)-O(4)#3                                                            | 92.20(6)   | N(4)#1-Cd(1)-O(4)#3 | 100.12(7)  |

|                                                                          |            |                   |            |
|--------------------------------------------------------------------------|------------|-------------------|------------|
| O(2)#2-Cd(1)-O(4)#3                                                      | 152.80(6)  | N(1)-Cd(1)-O(4)#3 | 89.68(7)   |
| Symmetry codes: #1 = 1+x, -1+y, -1+z; #2 = 2-x, -y, -z; #3 = x, -1+y, z. |            |                   |            |
| Compound 5                                                               |            |                   |            |
| Zn(1)-O(1)                                                               | 1.919(2)   | Zn(1)-O(5)        | 1.924(2)   |
| Zn(1)-N(1)                                                               | 1.988(2)   | Zn(2)-O(2)        | 1.910(2)   |
| Zn(2)-O(6)                                                               | 1.953(3)   | Zn(2)-O(3)#1      | 1.902(2)   |
| O(1)-Zn(1)-O(5)                                                          | 114.78(10) | O(1)-Zn(1)-N(1)   | 104.16(10) |
| O(5)-Zn(1)-N(1)                                                          | 110.28(11) | O(2)-Zn(2)-O(6)   | 110.26(12) |
| O(3)#1-Zn(2)-O(2)                                                        | 111.44(10) | O(3)#1-Zn(2)-O(6) | 104.53(11) |
| Symmetry codes: #1 = 1-x, 1+y, 1.5-z.                                    |            |                   |            |
| Compound 6                                                               |            |                   |            |
| Zn(1)-O(1)                                                               | 2.089(2)   | Zn(1)-O(6)        | 2.139(3)   |
| Zn(2)-O(10)                                                              | 2.201(3)   | Zn(2)-O(13)       | 2.047(2)   |
| Zn(3)-O(12)                                                              | 2.122(3)   | Zn(3)-O(15)#5     | 2.324(3)   |
| Zn(3)-O(16)#5                                                            | 2.337(3)   | Zn(4)-O(8)        | 2.119(3)   |
| Zn(4)-O(4)#5                                                             | 1.964(3)   | Zn(1)-N(1)        | 2.033(3)   |
| Zn(1)-N(11)                                                              | 2.032(3)   | Zn(2)-N(4)        | 2.002(3)   |
| Zn(2)-N(9)                                                               | 2.037(3)   | Zn(3)-N(5)        | 2.023(3)   |
| Zn(3)-N(13)                                                              | 2.013(3)   | Zn(4)-N(7)        | 2.038(3)   |
| Zn(4)-N(15)                                                              | 2.033(3)   |                   |            |
| N(11)-Zn(1)-N(1)                                                         | 114.43(14) | N(11)-Zn(1)-O(1)  | 98.01(11)  |
| N(1)-Zn(1)-O(1)                                                          | 102.27(11) | N(11)-Zn(1)-O(6)  | 90.65(12)  |
| N(1)-Zn(1)-O(6)                                                          | 125.48(12) | O(1)-Zn(1)-O(6)   | 122.11(11) |
| N(4)-Zn(2)-N(9)                                                          | 114.00(14) | N(4)-Zn(2)-O(13)  | 97.76(12)  |
| N(9)-Zn(2)-O(13)                                                         | 91.65(12)  | N(4)-Zn(2)-O(10)  | 96.36(12)  |
| N(9)-Zn(2)-O(10)                                                         | 94.23(12)  | O(13)-Zn(2)-O(10) | 160.95(11) |

|                                           |            |                       |            |
|-------------------------------------------|------------|-----------------------|------------|
| N(13)-Zn(3)-N(5)                          | 113.31(15) | N(13)-Zn(3)-O(12)     | 90.54(12)  |
| N(5)-Zn(3)-O(12)                          | 122.42(12) | N(15)-Zn(4)-N(7)      | 113.05(14) |
| N(15)-Zn(4)-O(8)                          | 127.97(12) | N(7)-Zn(4)-O(8)       | 91.62(12)  |
| O(4)#5-Zn(4)-O(8)                         | 109.16(12) | O(12)-Zn(3)-O(16)#5   | 136.55(9)  |
| O(12)-Zn(3)-O(15)#5                       | 109.80(10) | O(15)#5-Zn(3)-O(16)#5 | 54.29(10)  |
| O(4)#5-Zn(4)-N(7)                         | 109.80(10) | O(4)#5-Zn(4)-N(15)    | 102.94(13) |
| N(5)-Zn(3)-O(15)#5                        | 88.08(13)  | N(5)-Zn(3)-O(16)#5    | 98.85(11)  |
| N(13)-Zn(3)-O(15)#5                       | 136.63(13) | N(13)-Zn(3)-O(16)#5   | 84.36(11)  |
| Symmetry codes: #5 = -1+x, y, z.          |            |                       |            |
| Compound 7                                |            |                       |            |
| Zn(1)-O(1)                                | 1.966(3)   | Zn(1)-N(1)            | 2.041(3)   |
| Zn(1)-N(3)                                | 2.032(4)   | Zn(1)-O(4)#1          | 1.980(3)   |
| O(1)-Zn(1)-N(3)                           | 121.33(14) | O(1)-Zn(1)-N(1)       | 95.18(13)  |
| N(3)-Zn(1)-N(1)                           | 101.71(14) | O(1)-Zn(1)-O(4)#1     | 108.90(12) |
| O(4)#1-Zn(1)-N(1)                         | 127.40(12) | O(4)#1-Zn(1)-N(3)     | 103.92(12) |
| Symmetry codes: #1 = -1+x, 1.5-y, -0.5+z. |            |                       |            |

**Table S2.** Hydrogen bond lengths (Å) and angles(°) for the Compounds **2**, **3**, and **6**

| D-H...A            | d(D-H) | d(H...A) | d(D...A)   | ∠DHA  | Symmetry code     |
|--------------------|--------|----------|------------|-------|-------------------|
| <b>Compound 2</b>  |        |          |            |       |                   |
| O(3)-H(3A)...O(2)  | 0.82   | 1.85     | 2.6451(17) | 162.4 | 2-x, 1-y, 1-z     |
| <b>Compound 3</b>  |        |          |            |       |                   |
| O(5)-H(5)...O(4)   | 0.82   | 1.84     | 2.6568(18) | 173.6 | 1-x, 1-y, 2-z     |
| <b>Compound 6</b>  |        |          |            |       |                   |
| C(12)-H(12)...O(5) | 0.93   | 2.08     | 2.918(5)   | 149.8 | 1-x, 1-y, -z      |
| C(17)-H(17)...O(3) | 0.93   | 2.29     | 3.216(5)   | 173.9 | 1-x, 1/2+y, 1/2-z |

**Table S3.** Luminescence data for organic ligands and coordination polymers in the solid state.

| Compound | $\lambda_{\text{ex}}$ [nm] | $\lambda_{\text{em}}$ [nm] | Ligand                  | $\lambda_{\text{ex}}$ [nm] | $\lambda_{\text{em}}$ [nm] |
|----------|----------------------------|----------------------------|-------------------------|----------------------------|----------------------------|
| 3        | 394                        | 508                        | BIBP                    | 354                        | 496                        |
| 4        | 397                        | 513                        | H <sub>2</sub> hfipbb   | 290                        | 325                        |
| 5        | 392                        | 526                        | H <sub>2</sub> bdc      | 276                        | 380                        |
| 6        | 393                        | 520                        | 5-OH-H <sub>2</sub> bdc | 289                        | 368                        |
| 7        | 390                        | 485                        |                         |                            |                            |

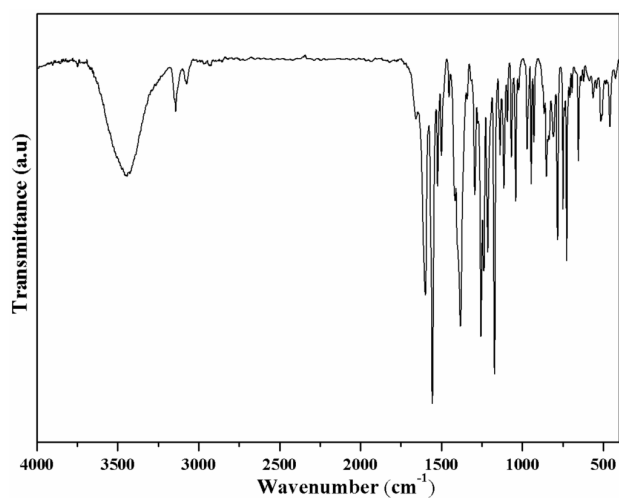

**Figure S1.** IR spectra of compound 1

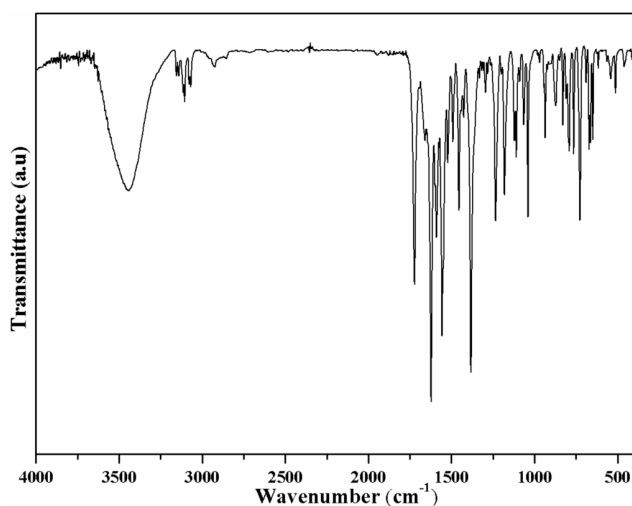

**Figure S2.** IR spectra of compound 2

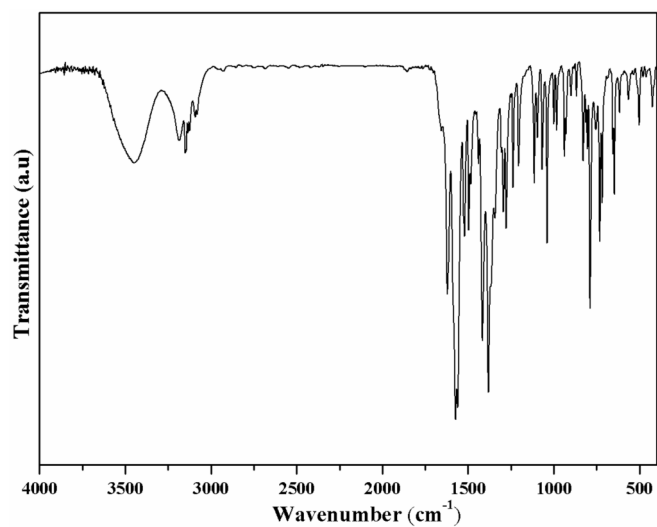

**Figure S3.** IR spectra of compound 3

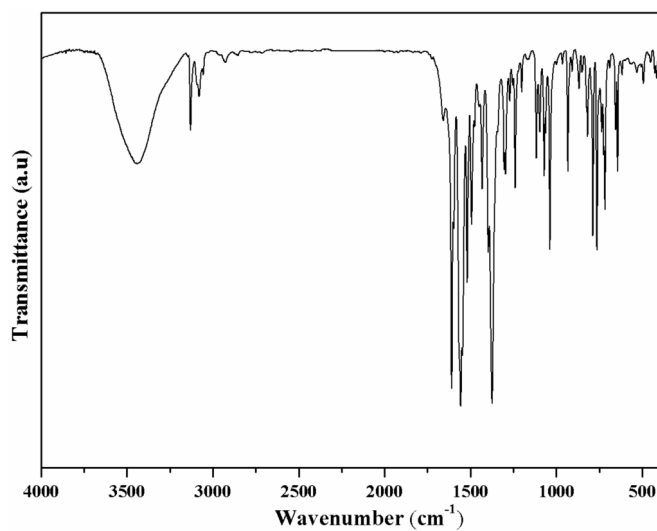

**Figure S4.** IR spectra of compound 4

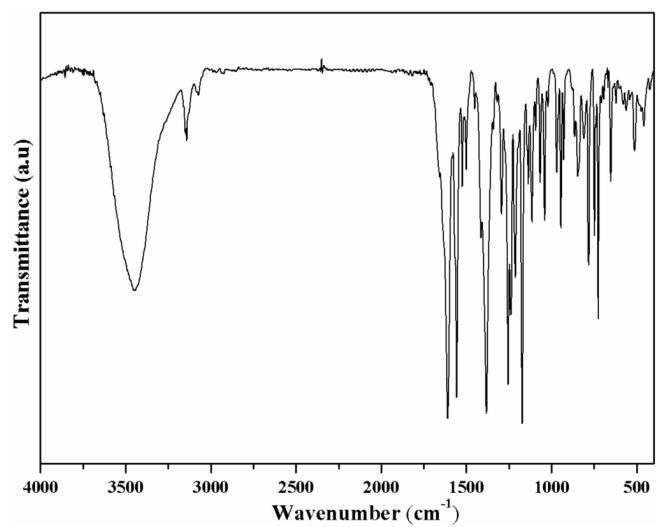

**Figure S5.** IR spectra of compound 5

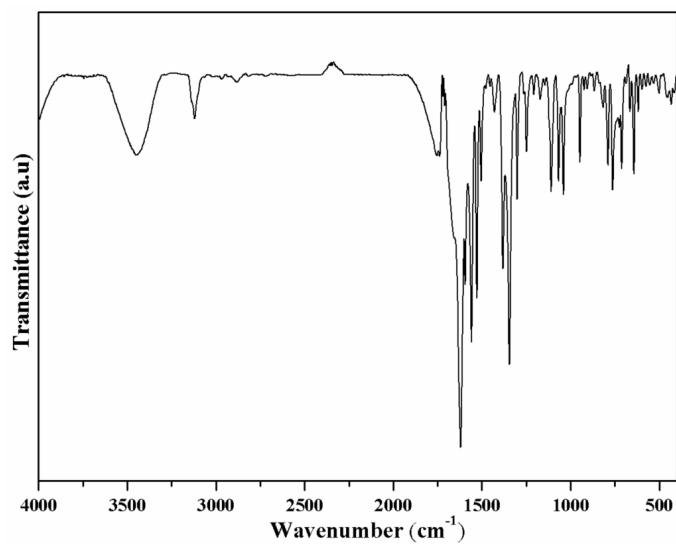

Figure S6. IR spectra of compound 6

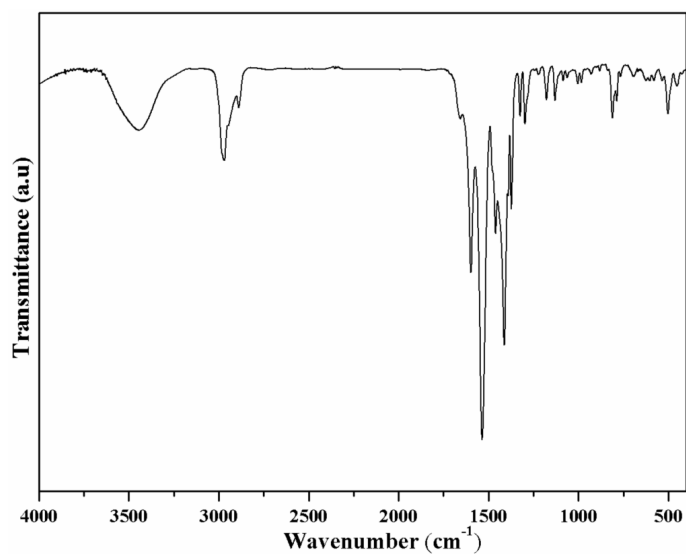

Figure S7. IR spectra of compound 7

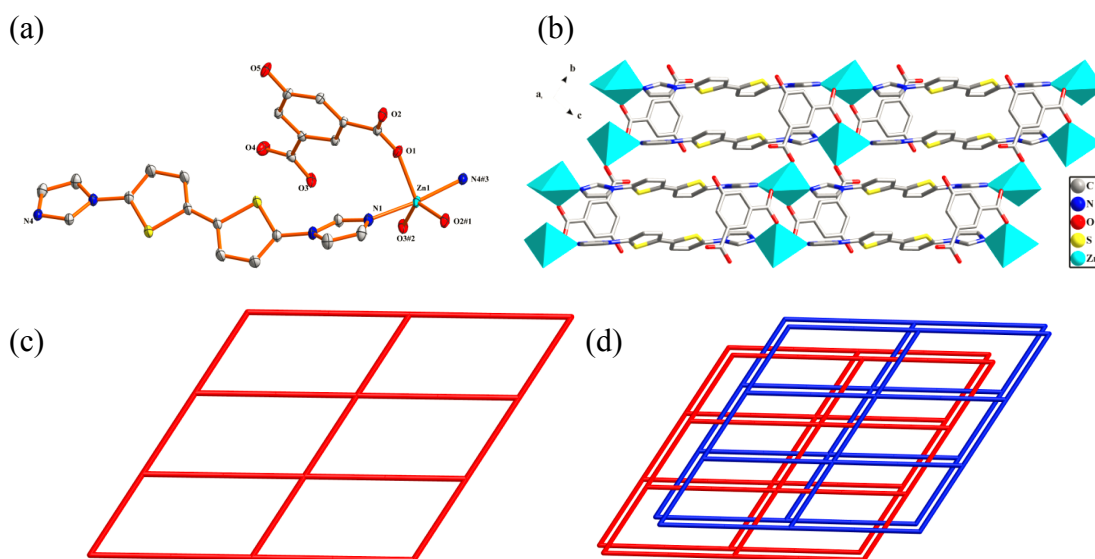

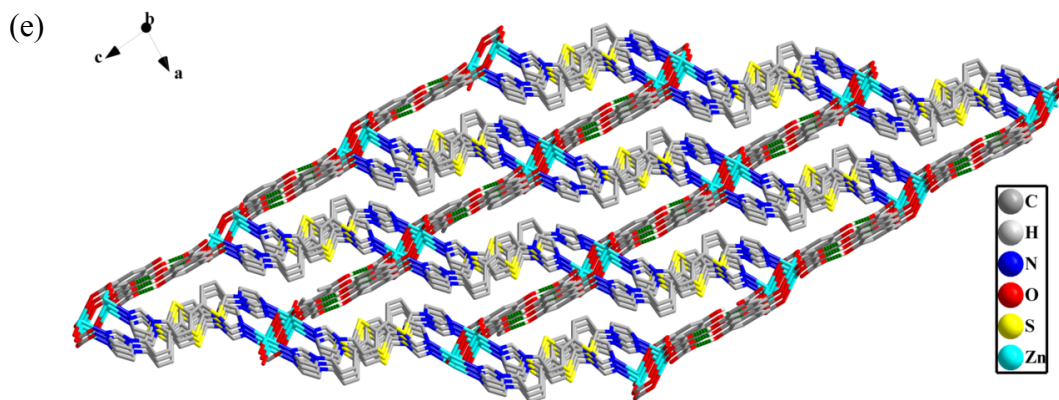

**Figure S8.** (a) Coordination environment of the Zn(II) cation in **3** (30% probability displacement ellipsoids). The hydrogen atoms are omitted for clarity. Symmetry codes: #1 =  $1-x, -y, 1-z$ ; #2 =  $1-x, 1-y, 1-z$ ; #3 =  $1+x, -1+y, -1+z$ . (b) Polyhedral view of the 2D coordination network of **3**. (c) View of an **sql** type net of **3**. (d) Packing diagram showing the ABAB type offset stacks of 2D sheets in **3**. (e) Schematic representation the 3D supramolecular framework of **3** via the hydrogen bonds (green dashed line).

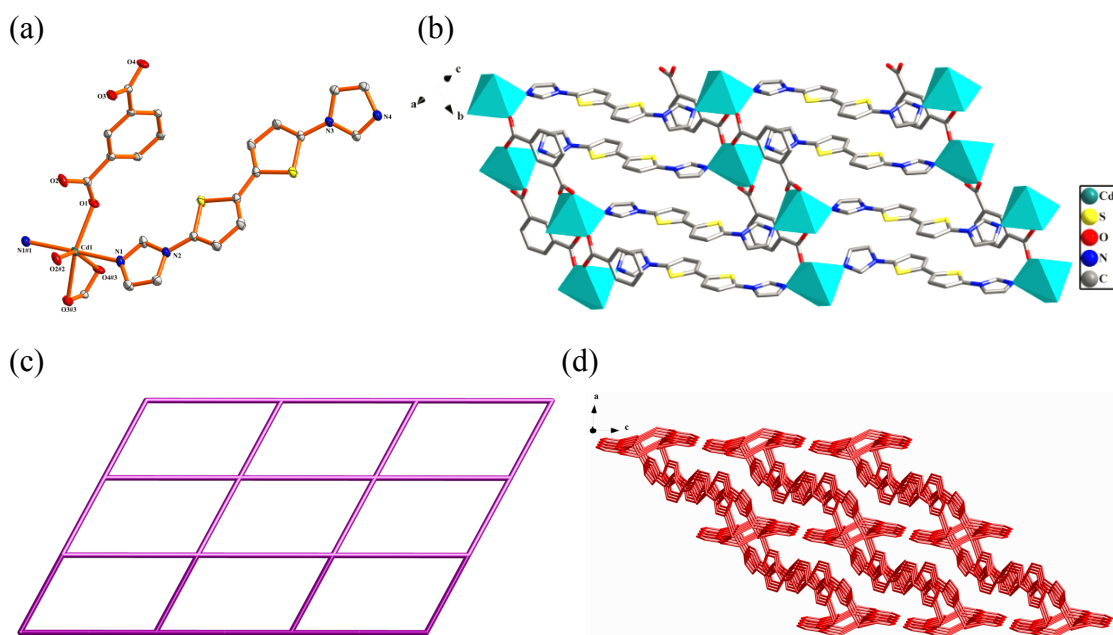

**Figure S9.** (a) Coordination environment of the Cd(II) cation in **4** (30% probability displacement ellipsoids). The hydrogen atoms are omitted for clarity. Symmetry codes: #1 =  $1+x, -1+y, -1+z$ ; #2 =  $2-x, -y, -z$ ; #3 =  $x, -1+y, z$ . (b) Polyhedral view of the 2D coordination network of **4**. (c) View of an **sql** type net of **4**. (d) Packing diagram showing the AAAA type offset stacks of 2D sheets in **4**.



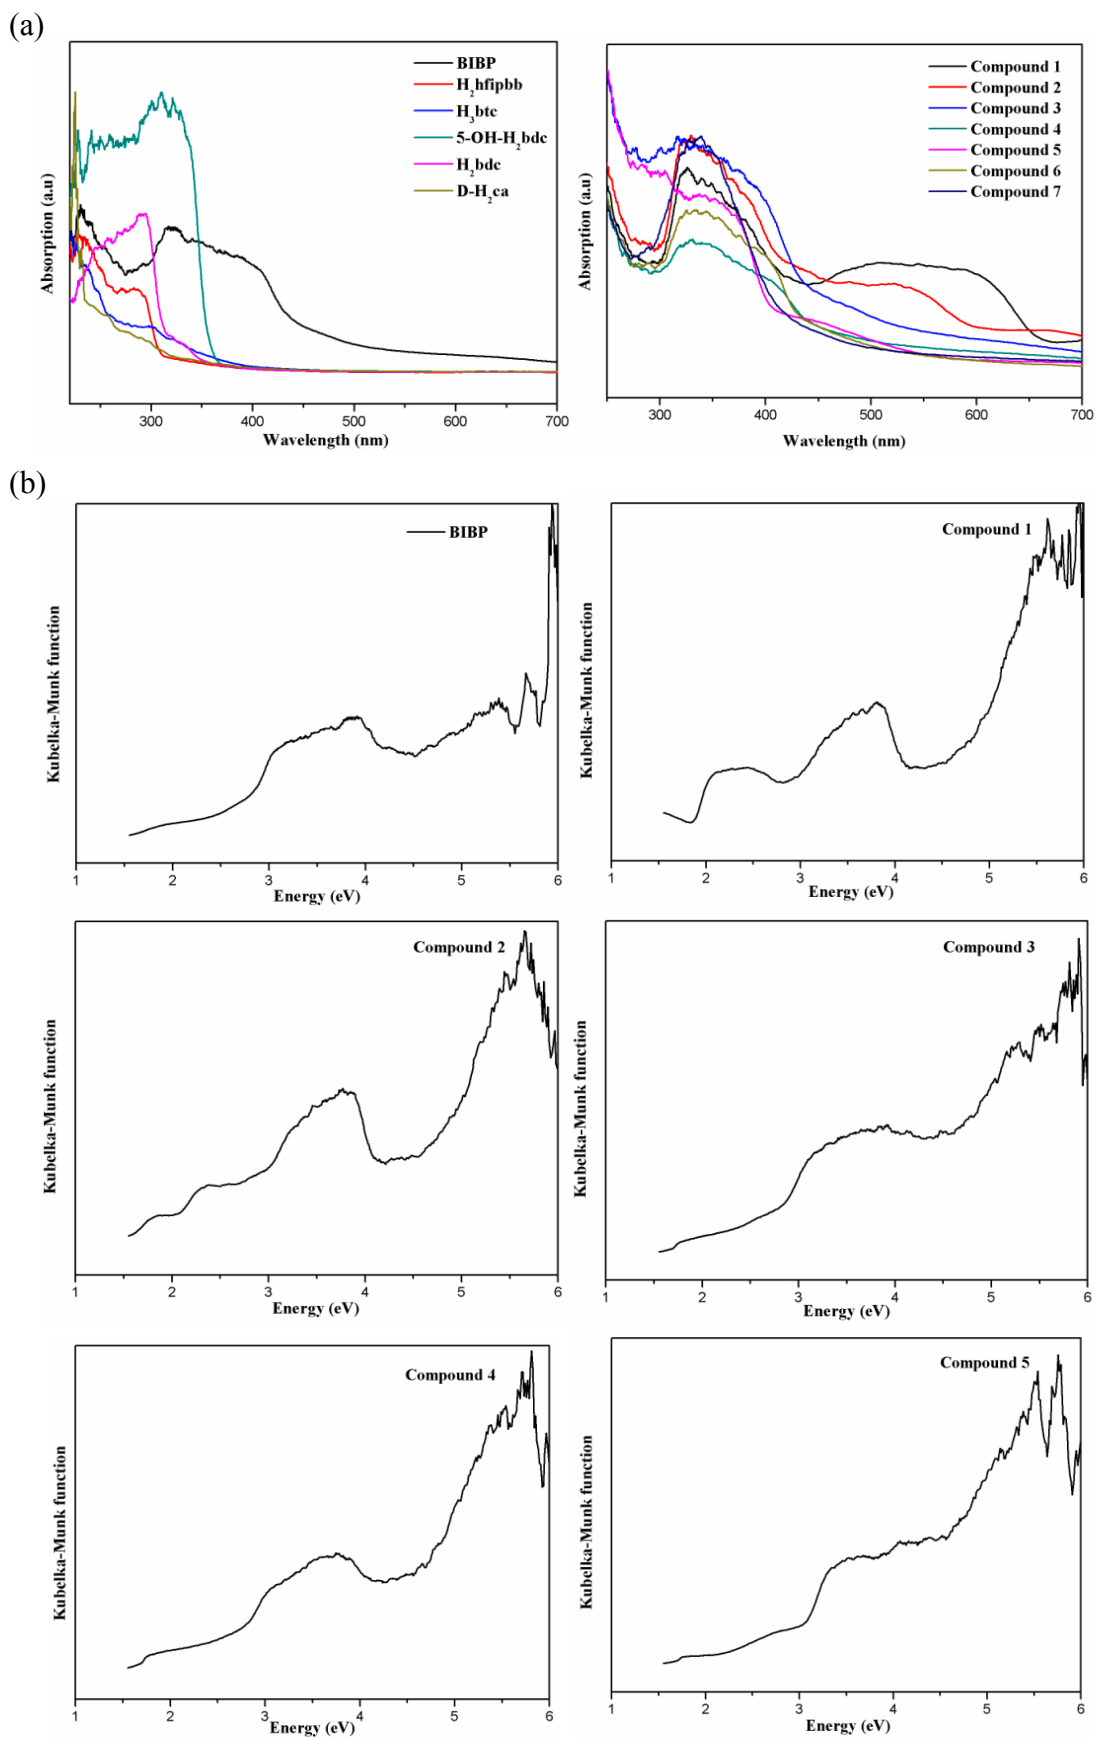

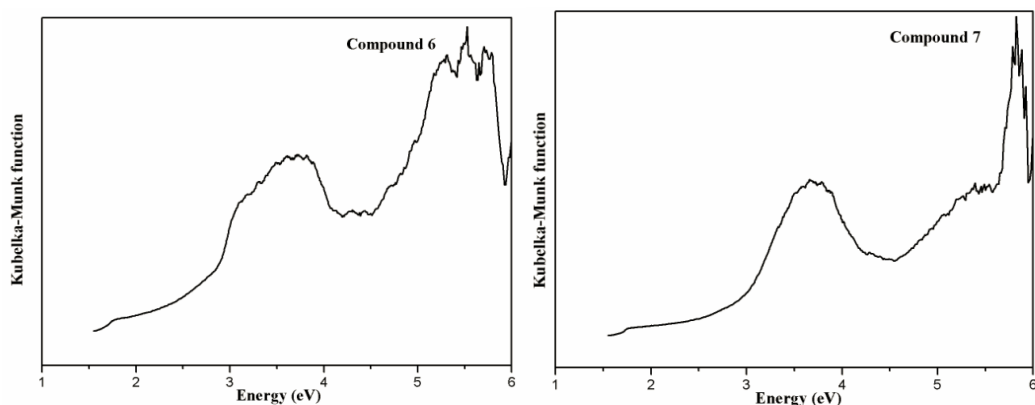

**Figure S10.** (a) UV-vis absorbance spectra and (b) Plot of Kubelka-Munk as a function of energy of the compounds and the free ligands at room temperature.

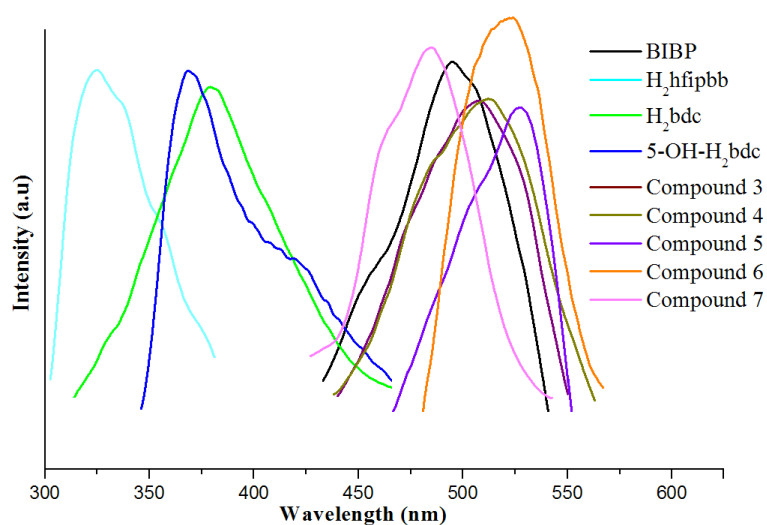

**Figure S11.** Solid-state photoluminescent spectra of 3, 4, 5, 6, 7 and corresponding ligands at room temperature.

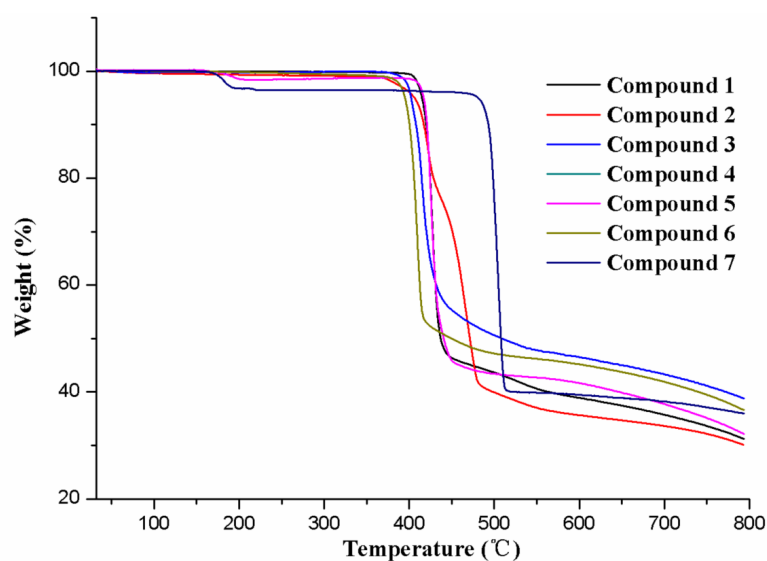

**Figure S12.** TGA curves of compounds 1-7.
